# Supplementary material for: Smoking-Related Health Beliefs in a Sample of Psychiatric Patients: Factors Associated with the Health Beliefs and Validation of the Health Belief Questionnaire
Source: MDPI journal article supplement (doi:10.3390/ijerph18041571), 2021-02-07
Supplement: s1 [file s1]

## Supplementary section

| No. | Item description                                                                                               | Smokers                                 |             |             |             | Ex-Smokers                           |                                        |             |             |            |                                    |
|-----|----------------------------------------------------------------------------------------------------------------|-----------------------------------------|-------------|-------------|-------------|--------------------------------------|----------------------------------------|-------------|-------------|------------|------------------------------------|
|     |                                                                                                                | <b>Very unlikely</b>                    |             |             |             | <b>Very likely</b>                   | <b>Very unlikely</b>                   |             |             |            | <b>Very likely</b>                 |
| 1   | How likely do you think it is that you will develop lung cancer in your lifetime?                              | 38<br>25.3%                             | 18<br>12.0% | 39<br>26.0% | 27<br>18.0% | 28<br>18.7%                          | 11<br>32.4%                            | 14<br>41.2% | 7<br>20.6%  | 2<br>5.9%  | 0<br>0.0%                          |
| 2   | How likely do you think it is that you will develop a smoking-related disease in your lifetime?                | 26<br>17.3%                             | 20<br>13.3% | 32<br>21.3% | 41<br>27.3% | 31<br>20.7%                          | 10<br>29.4%                            | 13<br>38.2% | 9<br>26.5%  | 2<br>5.9%  | 0<br>0.0%                          |
| 3   | I am in danger of developing lung cancer because I smoke                                                       | <b>Strongly disagree</b><br>32<br>21.3% |             |             |             | <b>Strongly agree</b><br>44<br>29.3% | <b>Strongly disagree</b><br>9<br>26.5% |             |             |            | <b>Strongly agree</b><br>2<br>5.9% |
| 4   | I am in danger of developing a smoking-related disease because I smoke.                                        | 22<br>14.7%                             | 16<br>10.7% | 29<br>19.3% | 36<br>24.0% | 47<br>31.3%                          | 7<br>20.6%                             | 11<br>32.4% | 8<br>23.5%  | 6<br>17.7% | 2<br>5.9%                          |
| 5   | Compared to others your age and sex, what do you think is your chance of getting lung cancer in your lifetime? | <b>Much lower</b><br>27<br>18.0%        |             |             |             | <b>Much higher</b><br>30<br>20.0%    | <b>Much lower</b><br>10<br>29.4%       |             |             |            | <b>Much higher</b><br>1<br>2.9%    |
| 6   | Compared to others your age and sex, what do you think is your chance of                                       | 22<br>14.7%                             | 19<br>12.7% | 43<br>28.7% | 39<br>26.0% | 27<br>18.0%                          | 9<br>26.5%                             | 10<br>29.4% | 13<br>38.2% | 1<br>2.9%  | 1<br>2.9%                          |

|    |                                                                                                                                                                        |                         |             |             |             |                        |                         |             |             |            |                       |
|----|------------------------------------------------------------------------------------------------------------------------------------------------------------------------|-------------------------|-------------|-------------|-------------|------------------------|-------------------------|-------------|-------------|------------|-----------------------|
| 7  | getting a smoking-related disease in your lifetime?<br>Compared with other (former) smokers, what do you think is your chance of getting lung cancer in your lifetime? | 17<br>11.3%             | 24<br>16.0% | 47<br>31.3% | 28<br>18.7% | 34<br>22.7%            | 10<br>29.4%             | 14<br>41.2% | 8<br>23.5%  | 2<br>5.9%  | 0<br>0.0%             |
| 8  | Compared with other (current) smokers, what do you think is your chance of getting lung cancer in your lifetime?                                                       | 26<br>17.3%             | 18<br>12.0% | 61<br>40.7% | 24<br>16.0% | 21<br>14.0%            | 19<br>57.6%             | 9<br>27.3%  | 3<br>9.1%   | 2<br>6.1%  | 0<br>0.0%             |
| 9  | Compared with other (former) smokers, what do you think is your chance of getting a smoking-related disease in your lifetime?                                          | 20<br>13.3%             | 22<br>14.7% | 42<br>28.0% | 41<br>27.3% | 25<br>16.7%            | 12<br>35.3%             | 13<br>38.2% | 7<br>20.6%  | 2<br>5.9%  | 0<br>0.0%             |
| 10 | Compared with other (current) smokers, what do you think is your chance of getting a smoking-related disease in your lifetime?                                         | 23<br>15.3%             | 22<br>14.7% | 61<br>40.7% | 21<br>14.0% | 23<br>15.3%            | 19<br>57.6%             | 8<br>24.2%  | 5<br>15.2%  | 1<br>3.0%  | 0<br>0.0%             |
| 11 | I am more in danger of developing lung cancer than the average person.                                                                                                 | 29<br>19.3%             | 18<br>12.0% | 15<br>10.0% | 52<br>34.7% | 36<br>24.0%            | 14<br>41.2%             | 6<br>17.7%  | 10<br>29.4% | 4<br>11.8% | 0<br>0.0%             |
| 12 | I am more in danger of developing a smoking-related disease than the average person.                                                                                   | 24<br>16.0%             | 23<br>15.3% | 21<br>14.0% | 44<br>29.3% | 38<br>25.3%            | 11<br>32.4%             | 9<br>26.5%  | 11<br>32.4% | 3<br>8.8%  | 0<br>0.0%             |
| 13 |                                                                                                                                                                        | <b>Not at all</b><br>42 | 23          | 30          | 23          | <b>Extremely</b><br>31 | <b>Not at all</b><br>15 | 8           | 3           | 5          | <b>Extremely</b><br>3 |

|    |                                                                                                                                                                 |             |             |             |             |              |             |             |            |             |             |
|----|-----------------------------------------------------------------------------------------------------------------------------------------------------------------|-------------|-------------|-------------|-------------|--------------|-------------|-------------|------------|-------------|-------------|
|    | How worried are you about getting lung cancer in your lifetime?                                                                                                 | 28.2%       | 15.4%       | 20.1%       | 15.4%       | 20.8%        | 44.1%       | 23.5%       | 8.8%       | 14.7%       | 8.8%        |
| 14 | How worried are you about getting a smoking-related disease in your lifetime?                                                                                   | 44<br>29.3% | 26<br>17.3% | 28<br>18.7% | 24<br>16.0% | 28<br>18.7%  | 12<br>35.3% | 11<br>32.4% | 3<br>8.8%  | 5<br>14.7%  | 3<br>8.8%   |
| 15 | How often do you worry about lung cancer?                                                                                                                       | 60<br>40.0% | 26<br>17.3% | 29<br>19.3% | 14<br>9.3%  | 21<br>14.0%  | 18<br>52.9% | 7<br>20.6%  | 4<br>11.8% | 1<br>2.9%   | 4<br>11.8%  |
| 16 | How often do you worry about smoking-related diseases (other than lung cancer, such as emphysema, stroke, and heart disease)?                                   | 51<br>34.0% | 30<br>20.0% | 28<br>18.7% | 21<br>14.0% | 20<br>13.3%  | 13<br>38.2% | 11<br>32.4% | 3<br>8.8%  | 3<br>8.8%   | 4<br>11.8%  |
| 17 | How dangerous do you think lung cancer is?                                                                                                                      | 10<br>6.7%  | 6<br>4.0%   | 14<br>9.3%  | 15<br>10.0% | 105<br>70.0% | 0<br>0.0%   | 1<br>2.9%   | 2<br>5.9%  | 5<br>14.7%  | 26<br>76.5% |
| 18 | How dangerous do you think smoking-related diseases are?                                                                                                        | 11<br>7.3%  | 9<br>6.0%   | 24<br>16.0% | 36<br>24.0% | 70<br>46.7%  | 1<br>2.9%   | 0<br>0.0%   | 6<br>17.7% | 9<br>26.5%  | 18<br>52.9% |
| 19 | How serious would the health consequences be if you developed lung cancer?                                                                                      | 7<br>4.7%   | 8<br>5.3%   | 13<br>8.7%  | 14<br>9.3%  | 108<br>72.0% | 1<br>2.9%   | 2<br>5.9%   | 0<br>0.0%  | 9<br>26.5%  | 22<br>64.7% |
| 20 | How serious would the health consequences be if you developed a smoking-related disease (other than lung cancer, such as emphysema, stroke, and heart disease)? | 9<br>6.0%   | 7<br>4.7%   | 24<br>16.0% | 26<br>17.3% | 84<br>56.0%  | 2<br>5.9%   | 0<br>0.0%   | 2<br>5.9%  | 14<br>41.2% | 16<br>47.1% |
| 21 | In your opinion, how much would quitting smoking reduce your chances of getting lung cancer?                                                                    | 26<br>17.3% | 17<br>11.3% | 40<br>26.7% | 24<br>16.0% | 43<br>28.7%  | 3<br>8.8%   | 2<br>5.9%   | 8<br>23.5% | 7<br>20.6%  | 14<br>41.2% |

|     |                                                                                                            |             |             |             |             |             |           |           |            |            |             |
|-----|------------------------------------------------------------------------------------------------------------|-------------|-------------|-------------|-------------|-------------|-----------|-----------|------------|------------|-------------|
| 22  | In your opinion, how much would quitting smoking reduce your chances of getting a smoking-related disease? | 24<br>16.0% | 15<br>10.0% | 39<br>26.0% | 34<br>22.7% | 38<br>25.3% | 3<br>8.8% | 2<br>5.9% | 9<br>26.5% | 5<br>14.7% | 15<br>44.1% |
| 23  | In your opinion, how much would quitting smoking increase your chances of living longer?                   | 30<br>20.0% | 19<br>12.7% | 37<br>24.7% | 22<br>14.7% | 42<br>28.0% | 3<br>8.8% | 2<br>5.9% | 8<br>23.5% | 7<br>20.6% | 14<br>41.2% |
| 24* | How confident are you that you could quit smoking/stay quit for good if you wanted to?                     | 33<br>22.0% | 33<br>22.0% | 25<br>16.7% | 29<br>19.3% | 30<br>20.0% | 2<br>5.9% | 0<br>0.0% | 2<br>5.9%  | 7<br>20.6% | 23<br>67.7% |

---

\*This item was not included in total or factor scores
